# Supplementary material
Source: publisher figshare collection journal article supplement (https://asha.figshare.com/articles/dataset/_/14978454)
Supplement: Supplementary file 1 [file 1]

**Supplemental Material S2.** Assessment of Methodological Limitations (CASP).

| Study ID                      | Was the context described? | Was the sampling strategy appropriate and described? | Was the data collection strategy appropriate and described? | Was the data analysis appropriate and described? | Were the findings supported by evidence? | Is there evidence of researcher reflexivity? | Have ethical issues been taken into consideration? | Overall assessment of methodological limitations |
|-------------------------------|----------------------------|------------------------------------------------------|-------------------------------------------------------------|--------------------------------------------------|------------------------------------------|----------------------------------------------|----------------------------------------------------|--------------------------------------------------|
| Agarwall, 2015; Garnett, 2019 | yes                        | no                                                   | unclear                                                     | yes                                              | yes                                      | unclear                                      | unclear                                            | moderate concerns                                |
| Amsbury, 2020                 | yes                        | yes                                                  | yes                                                         | yes                                              | yes                                      | yes                                          | unclear                                            | minor                                            |
| Amsbury, 2019                 | yes                        | yes                                                  | yes                                                         | yes                                              | yes                                      | yes                                          | yes                                                | no or very minor concerns                        |
| Bloxham, 2015                 | yes                        | yes                                                  | yes                                                         | yes                                              | yes                                      | unclear                                      | unclear                                            | minor                                            |
| Carr, 2011, 2016              | yes                        | yes                                                  | yes                                                         | yes                                              | yes                                      | unclear                                      | unclear                                            | minor                                            |
| Coletti, 2011                 | yes                        | yes                                                  | yes                                                         | yes                                              | yes                                      | yes                                          | yes                                                | no or very minor                                 |
| Daczewitz, 2015               | yes                        | unclear                                              | no                                                          | unclear                                          | yes                                      | no                                           | yes                                                | serious concerns                                 |
| Donaldson, 2011               | unclear                    | unclear                                              | yes                                                         | unclear                                          | yes                                      | no                                           | unclear                                            | moderate concerns                                |
| Faltdt, 2020                  | yes                        | yes                                                  | yes                                                         | yes                                              | yes                                      | yes                                          | unclear                                            | no or very minor concerns                        |
| Frugone Jarmillo, 2020        | unclear                    | unclear                                              | yes                                                         | unclear                                          | yes                                      | no                                           | unclear                                            | moderate concerns                                |
| Kinnard, 2015                 | yes                        | yes                                                  | yes                                                         | yes                                              | yes                                      | yes                                          | unclear                                            | no or very minor concerns                        |

|                            |         |         |         |         |     |         |         |                           |
|----------------------------|---------|---------|---------|---------|-----|---------|---------|---------------------------|
| Kummerer, 2006, 2007, 2009 | yes     | unclear | yes     | yes     | yes | unclear | unclear | no or very minor concerns |
| Leadbitter, 2020           | yes     | yes     | yes     | yes     | yes | yes     | unclear | no or very minor concerns |
| Levickis et al., 2020      | yes     | yes     | yes     | yes     | yes | yes     | yes     | no or very minor concerns |
| Manohar, 2020              | yes     | unclear | yes     | yes     | yes | unclear | unclear | minor                     |
| Meadan, 2015               | unclear | unclear | yes     | yes     | yes | yes     | unclear | moderate                  |
| Meadan, 2019               | yes     | yes     | yes     | yes     | yes | unclear | unclear | minor                     |
| Mendez, 2019               | yes     | yes     | yes     | yes     | yes | unclear | yes     | minor                     |
| Patterson, 2011            | yes     | yes     | yes     | yes     | yes | unclear | no      | no or very minor concerns |
| Pennington, 2009           | yes     | yes     | yes     | yes     | yes | yes     | no      | no or very minor concerns |
| Pickard et al., 2016       | yes     | unclear | unclear | yes     | yes | no      | no      | moderate concerns         |
| Schertz, 2005, 2007        | yes     | yes     | unclear | unclear | yes | no      | no      | moderate concerns         |
| Senet-Capuz, 2020          | yes     | unclear | unclear | unclear | yes | no      | unclear | moderate concerns         |
| Shamsudin, 2020            | yes     | yes     | yes     | yes     | yes | unclear | unclear | no or very minor concerns |
| Stahmer, 2017              | yes     | yes     | unclear | yes     | yes | no      | no      | minor                     |
| Stockwell, 2019            | yes     | yes     | unclear | no      | yes | no      | no      | moderate concerns         |
| Waddington, 2020           | yes     | yes     | no      | unclear | yes | yes     | no      | minor concerns            |
