# Supplementary material
Source: publisher figshare collection journal article supplement (https://asha.figshare.com/articles/dataset/_/14978454)
Supplement: Supplementary file 2 [file 1]

**Supplemental Material S3. GRADE CERQual Full Evidence Profile**

**Readiness**

**Coming to terms with a child's disability**

| Summary of review finding                                                                                                                                             | Studies contributing to the review finding                                                                                                                                                                                                 | Methodological limitations                                                                                                                         | Coherence                        | Relevance                                                                                                                                                                                                              | Adequacy                         | CERQual assessment of confidence in the evidence | Explanation of CERQual assessment                                                                                          |
|-----------------------------------------------------------------------------------------------------------------------------------------------------------------------|--------------------------------------------------------------------------------------------------------------------------------------------------------------------------------------------------------------------------------------------|----------------------------------------------------------------------------------------------------------------------------------------------------|----------------------------------|------------------------------------------------------------------------------------------------------------------------------------------------------------------------------------------------------------------------|----------------------------------|--------------------------------------------------|----------------------------------------------------------------------------------------------------------------------------|
| <b>Finding 1: Parents may be feeling overwhelmed by their child's diagnosis at the beginning of the intervention</b>                                                  | Amsbary, 2020; Amsbary, 2019; Bloxam, 2015; Carr, 2011; Coletti, 2011; Donaldson, 2011; Kinnard, 2014; Leadbitter, 2020; Manohar, 2020; Meadan, 2019; Patterson, 2011; Pennington, 2009; Pickard, 2016; Schertz, 2005, 2007; Stahmer, 2017 | <b>Minor concerns</b> based on the assessment of 6 studies with no, 5 with minor, and 4 with moderate methodological limitations                   | <b>Minor concerns</b>            | <b>Minor concerns</b> regarding relevance as studies had good geographical spread<br><br>Included a good range of diagnoses<br><br>Participants included participants from a range of ethnic and SES groups            | <b>No or very minor concerns</b> | <b>High confidence</b>                           | No or very minor concerns regarding adequacy; minor concerns regarding coherence, relevance and methodological limitations |
| <b>Finding 2: Parents may have underlying emotional needs at the beginning of the intervention linked to their child's communication and behavioural difficulties</b> | Amsbary, 2020; Amsbary, 2019; Bloxam, 2015; Carr, 2011; Daczewitz, 2015; Faldt, 2020; Meadan, 2019; Mendez, 2019; Patterson, 2011; Pennington, 2009; Schertz, 2005, 2007                                                                   | <b>Minor concerns</b> based on the assessment of 4 studies with no, 4 with minor, 2 with moderate, and one with serious methodological limitations | <b>No or very minor concerns</b> | <b>No or very minor concerns</b> regarding relevance as studies had good geographical spread<br><br>Included a good range of diagnoses<br><br>Participants included participants from a range of ethnic and SES groups | <b>No or very minor concerns</b> | <b>High confidence</b>                           | Minor concerns regarding methodological limitations; no or very minor concerns regarding coherence, relevance and adequacy |

### Competing Demands

| Summary of review finding                                                                                    | Studies contributing to the review finding                                                                                                                                                                                                                                                                                                              | Methodological limitations                                                                                                                                    | Coherence                        | Relevance                                                                                                                                                                                                              | Adequacy                         | CERQual assessment of confidence in the evidence | Explanation of CERQual assessment                                                                 |
|--------------------------------------------------------------------------------------------------------------|---------------------------------------------------------------------------------------------------------------------------------------------------------------------------------------------------------------------------------------------------------------------------------------------------------------------------------------------------------|---------------------------------------------------------------------------------------------------------------------------------------------------------------|----------------------------------|------------------------------------------------------------------------------------------------------------------------------------------------------------------------------------------------------------------------|----------------------------------|--------------------------------------------------|---------------------------------------------------------------------------------------------------|
| <b>Finding 3: Parents who have competing demands on their time may find it difficult to engage with PCIT</b> | Amsbary, 2020; Amsbary, 2019; Bloxam, 2015; Carr, 2011; Coletti, 2011; Daczewitz, 2015; Faldt, 2020; Kinnard, 2014; Kummerer, 2009; Leadbitter, 2020; Manohar, 2020; Meaden, 2015; Mendez, 2019; Patterson, 2011; Pennington, 2009; Pickard, 2016; Schertz, 2005; Senent-Capuz, 2020; Shamsudin, 2021; Stahmer, 2017; Stockwell, 2019; Waddington, 2020 | <b>No or very minor concerns</b> based on the assessment of 9 studies with no, 8 with minor, 4 with moderate, and one with serious methodological limitations | <b>No or very minor concerns</b> | <b>No or very minor concerns</b> regarding relevance as studies had good geographical spread<br><br>Included a good range of diagnoses<br><br>Participants included participants from a range of ethnic and SES groups | <b>No or very minor concerns</b> | <b>High confidence</b>                           | No or very minor concerns regarding methodological limitations, coherence, relevance and adequacy |

### Parental Expectations

| Summary of review finding                                                                      | Studies contributing to the review finding                                                               | Methodological limitations                                                                   | Coherence                        | Relevance                                                                                    | Adequacy                         | CERQual assessment of confidence in the evidence | Explanation of CERQual assessment                                                                 |
|------------------------------------------------------------------------------------------------|----------------------------------------------------------------------------------------------------------|----------------------------------------------------------------------------------------------|----------------------------------|----------------------------------------------------------------------------------------------|----------------------------------|--------------------------------------------------|---------------------------------------------------------------------------------------------------|
| <b>Finding 4: It may be helpful to explore parental expectations about the intervention in</b> | Amsbary, 2020; Bloxam, 2015; Coletti, 2011; Daczewitz, 2015; Faldt, 2020; Kinnard, 2014; Kummerer, 2006, | <b>No or very minor concerns</b> based on the assessment of 9 studies with no, 4 with minor, | <b>No or very minor concerns</b> | <b>No or very minor concerns</b> regarding relevance as studies had good geographical spread | <b>No or very minor concerns</b> | <b>High confidence</b>                           | No or very minor concerns regarding methodological limitations, coherence, relevance and adequacy |

|                                                                                                                         |                                                                                                                                                                                                                                                     |                                                                                                                                                |                                  |                                                                                                                                                                                                                        |                                                                  |                        |                                                                                                                                 |
|-------------------------------------------------------------------------------------------------------------------------|-----------------------------------------------------------------------------------------------------------------------------------------------------------------------------------------------------------------------------------------------------|------------------------------------------------------------------------------------------------------------------------------------------------|----------------------------------|------------------------------------------------------------------------------------------------------------------------------------------------------------------------------------------------------------------------|------------------------------------------------------------------|------------------------|---------------------------------------------------------------------------------------------------------------------------------|
| <b>advance intervention.</b>                                                                                            | 2007, 2009; Leadbitter, 2020; Levickis, 2020; Meaden, 2015; Patterson, 2011; Pennington, 2009; Shamsudin, 2021; Stahmer, 2017                                                                                                                       | and one with serious methodological limitations                                                                                                |                                  | Included a good range of diagnoses<br><br>Participants included participants from a range of ethnic and SES groups                                                                                                     |                                                                  |                        |                                                                                                                                 |
| <b>Finding 5: Clarity on the roles that parents and clinicians play in PCIT interventions may facilitate readiness.</b> | Amsbary, 2019; Bloxam, 2015; Carr, 2011; Coletti, 2011; Faldt, 2020; Kinnard, 2014; Leadbitter, 2020; Levickis, 2020; Meadan, 2019; Meaden, 2015; Mendez, 2019; Patterson, 2011; Pennington, 2009; Schertz, 2005; Senent-Capuz, 2020; Stahmer, 2017 | <b>No or very minor concerns</b> based on the assessment of 9 studies with no, 4 with minor and three with moderate methodological limitations | <b>No or very minor concerns</b> | <b>No or very minor concerns</b> regarding relevance as studies had good geographical spread<br><br>Included a good range of diagnoses<br><br>Participants included participants from a range of ethnic and SES groups | <b>Minor concerns</b> (data is rich from some, thin from others) | <b>High confidence</b> | Minor concerns regarding and adequacy; no or very minor concerns regarding methodological limitations, coherence, and relevance |

### Engagement

#### Tailored to needs and preferences

| Summary of review finding                                                                           | Studies contributing to the review finding                                                                                        | Methodological limitations                                                                               | Coherence             | Relevance                                                                         | Adequacy                         | CERQual assessment of confidence in the evidence | Explanation of CERQual assessment                                                                                         |
|-----------------------------------------------------------------------------------------------------|-----------------------------------------------------------------------------------------------------------------------------------|----------------------------------------------------------------------------------------------------------|-----------------------|-----------------------------------------------------------------------------------|----------------------------------|--------------------------------------------------|---------------------------------------------------------------------------------------------------------------------------|
| <b>Finding 6: Parents may be more likely to engage with the intervention when it is oriented to</b> | Amsbary, 2019, 2020; Bloxam, 2015; Carr, 2011; Coletti, 2011; Faldt, 2020; Frugone Jarmillo, 2020; Kinnard, 2014; Kummerer, 2006; | <b>Minor concerns</b> based on the assessment of 7 studies with no, 8 with minor, and four with moderate | <b>Minor concerns</b> | <b>Minor concerns</b> regarding relevance as studies had good geographical spread | <b>No or very minor concerns</b> | <b>High confidence</b>                           | Minor concerns regarding methodological limitations coherence and relevance; no or very minor concerns regarding adequacy |

|                                                                                                                                                                                 |                                                                                                                                                                                                                                                            |                                                                                                                                                      |                                  |                                                                                                                                                                                                                        |                                  |                        |                                                                                                                            |
|---------------------------------------------------------------------------------------------------------------------------------------------------------------------------------|------------------------------------------------------------------------------------------------------------------------------------------------------------------------------------------------------------------------------------------------------------|------------------------------------------------------------------------------------------------------------------------------------------------------|----------------------------------|------------------------------------------------------------------------------------------------------------------------------------------------------------------------------------------------------------------------|----------------------------------|------------------------|----------------------------------------------------------------------------------------------------------------------------|
| <b>their family routines.</b>                                                                                                                                                   | Manohar, 2020; Meaden, 2015; Mendez, 2019; Pennington, 2009; Pickard, 2016; Schertz, 2005; Shamsudin, 2021; Stahmer, 2017; Stockwell, 2019; Waddington, 2020                                                                                               | methodological limitations                                                                                                                           |                                  | Included a good range of diagnoses (although dominated by ASD)<br><br>Participants included participants from a range of ethnic and SES groups                                                                         |                                  |                        |                                                                                                                            |
| <b>Finding 7: Parents may be more likely to engage with an intervention when it is inclusive of their wider family and belief systems and delivered in their first language</b> | Amsbary, 2019, 2020; Carr, 2011; Coletti, 2011; Daczewitz, 2015; Faldt, 2020; Kinnard 2014; Kummerer, 2006, 2007, 2009; Manohar, 2020; Meadan 2019; Mendez, 2019; Patterson, 2011; Pennington, 2009; Senent-Capuz, 2020; Shamsudin, 2021; Waddington, 2020 | <b>Minor concerns</b> based on the assessment of 8 studies with no, 5 with minor, two with moderate, and one with serious methodological limitations | <b>No or very minor concerns</b> | <b>No or very minor concerns</b> regarding relevance as studies had good geographical spread<br><br>Included a good range of diagnoses<br><br>Participants included participants from a range of ethnic and SES groups | <b>No or very minor concerns</b> | <b>High confidence</b> | Minor concerns regarding methodological limitations; no or very minor concerns regarding coherence, relevance and adequacy |

#### Service delivery

| Summary of review finding                                                                                                    | Studies contributing to the review finding                           | Methodological limitations                                                                              | Coherence                        | Relevance                                                                                    | Adequacy                 | CERQual assessment of confidence in the evidence | Explanation of CERQual assessment                                                                                       |
|------------------------------------------------------------------------------------------------------------------------------|----------------------------------------------------------------------|---------------------------------------------------------------------------------------------------------|----------------------------------|----------------------------------------------------------------------------------------------|--------------------------|--------------------------------------------------|-------------------------------------------------------------------------------------------------------------------------|
| <b>Finding 8: Families with a reduced capacity to engage with the intervention due to social and economic challenges may</b> | Amsbary, 2019; Carr, 2011; Manohar, 2020; Meadan, 2019; Mendez, 2019 | <b>Minor concerns</b> based on the assessment of 1 studies with no, 3 with minor, and one with moderate | <b>No or very minor concerns</b> | <b>No or very minor concerns</b> regarding relevance as studies had good geographical spread | <b>Moderate concerns</b> | <b>Moderate confidence</b>                       | Moderate concerns regarding adequacy; Minor concerns regarding methodological limitations and no or very minor concerns |

|                                                                                                                                                                                                     |                                                                                                                                                                                                                                                   |                                                                                                                                              |                                  |                                                                                                                                                                                                                        |                                  |                        |                                                                                                                            |
|-----------------------------------------------------------------------------------------------------------------------------------------------------------------------------------------------------|---------------------------------------------------------------------------------------------------------------------------------------------------------------------------------------------------------------------------------------------------|----------------------------------------------------------------------------------------------------------------------------------------------|----------------------------------|------------------------------------------------------------------------------------------------------------------------------------------------------------------------------------------------------------------------|----------------------------------|------------------------|----------------------------------------------------------------------------------------------------------------------------|
| <b>benefit from additional support to enable them to attend.</b>                                                                                                                                    |                                                                                                                                                                                                                                                   | methodological limitations                                                                                                                   |                                  | Included a good range of diagnoses<br><br>Participants were from low income households, but from a range of ethnic groups                                                                                              |                                  |                        | regarding coherence and adequacy                                                                                           |
| <b>Finding 9: Group-based interventions may provide emotional and practical support for parents to share experiences with peers, but can be problematic when the children are of mixed ability.</b> | Amsbary, 2019; Coletti, 2011; Faldt, 2020; Levickis, 2020; Manohar, 2020; Meadan, 2019; Mendez, 2019; Patterson, 2011; Pennington, 2009; Senent-Capuz, 2020                                                                                       | <b>Minor concerns</b> based on the assessment of 6 studies with no, 2 with minor, and 2 with moderate methodological limitations             | <b>No or very minor concerns</b> | <b>No or very minor concerns</b> regarding relevance as studies had good geographical spread<br><br>Included a good range of diagnoses<br><br>Participants included participants from a range of ethnic and SES groups | <b>No or very minor concerns</b> | <b>High confidence</b> | Minor concerns regarding methodological limitations; no or very minor concerns regarding coherence, relevance and adequacy |
| <b>Finding 10: Individual intervention sessions and home visits may be valued as a more personalized approach for families</b>                                                                      | Amsbary, 2019; Carr 2011; Coletti, 2011; Faldt, 2020; Kinnard, 2014; Kummerer, 2006; Leadbitter, 2020; Levickis, 2020; Meadan, 2015, 2019; Mendez, 2019; Patterson, 2011; Pennington, 2009; Senent-Capuz, 2020; Shamsudin, 2021; Waddington, 2020 | <b>No or very minor concerns</b> based on the assessment of 10 studies with no, 4 with minor, and 2 with moderate methodological limitations | <b>No or very minor concerns</b> | <b>No or very minor concerns</b> regarding relevance as studies had good geographical spread<br><br>Included a good range of diagnoses<br><br>Participants included                                                    | <b>Minor concerns</b>            | <b>High confidence</b> | Minor concerns regarding adequacy; no or very minor concerns regarding methodological limitations, coherence and relevance |

|  |  |  |  |                                                    |  |  |  |
|--|--|--|--|----------------------------------------------------|--|--|--|
|  |  |  |  | participants from a range of ethnic and SES groups |  |  |  |
|--|--|--|--|----------------------------------------------------|--|--|--|

### Teaching and Learning

| Summary of review finding                                                                                                                                                           | Studies contributing to the review finding                                                                                                                                               | Methodological limitations                                                                                                       | Coherence                                                                                                                        | Relevance                                                                                                                                                                                                              | Adequacy                         | CERQual assessment of confidence in the evidence | Explanation of CERQual assessment                                                                                             |
|-------------------------------------------------------------------------------------------------------------------------------------------------------------------------------------|------------------------------------------------------------------------------------------------------------------------------------------------------------------------------------------|----------------------------------------------------------------------------------------------------------------------------------|----------------------------------------------------------------------------------------------------------------------------------|------------------------------------------------------------------------------------------------------------------------------------------------------------------------------------------------------------------------|----------------------------------|--------------------------------------------------|-------------------------------------------------------------------------------------------------------------------------------|
| <b>Finding 11: Parents prefer to see PCIT strategies modelled by the therapist with their child before they practice them and value constructive feedback.</b>                      | Amsbary, 2019; Coletti, 2011; Faldt, 2020; Levickis, 2020; Manohar, 2020; Meadan 2019; Meaden, 2015; Patterson, 2011; Pickard, 2016; Senent-Capuz, 2020; Stahmer, 2017; Waddington, 2020 | <b>Minor concerns</b> based on the assessment of 5 studies with no, 4 with minor, and 3 with moderate methodological limitations | <b>No or very minor concerns</b>                                                                                                 | <b>No or very minor concerns</b> regarding relevance as studies had good geographical spread<br><br>Included a good range of diagnoses<br><br>Participants included participants from a range of ethnic and SES groups | <b>Minor concerns</b>            | <b>High confidence</b>                           | Minor concerns regarding methodological limitations and adequacy; no or very minor concerns regarding coherence and relevance |
| <b>Finding 12: Video feedback on parental implementation of the strategies with their child are perceived as a useful learning tool, although can be uncomfortable for parents.</b> | Amsbary, 2020; Bloxam, 2015; Coletti, 2011; Faldt, 2020; Kinnard, 2014; Leadbitter, 2020; Meaden, 2015; Mendez, 2019; Pennington, 2009; Senent-Capuz, 2020; Stockwell, 2019              | <b>Minor concerns</b> based on the assessment of 5 studies with no, 3 with minor, and 3 with moderate methodological limitations | <b>Minor concerns</b> (6 studies report mixed findings; 2 mainly reported challenges; 1 mainly positive and one mainly negative) | <b>Minor concerns</b> regarding relevance as studies had good geographical spread<br><br>Included a good range of diagnoses                                                                                            | <b>No or very minor concerns</b> | <b>High confidence</b>                           | Minor concerns about methodological limitations; minor concerns regarding coherence, relevance and adequacy.                  |

|                                                                                                                                                                      |                                                                                                                                                                                                                               |                                                                                                                                                               |                                                                                                                                                |                                                                                                                                                                                                |                                  |                            |                                                                                                   |
|----------------------------------------------------------------------------------------------------------------------------------------------------------------------|-------------------------------------------------------------------------------------------------------------------------------------------------------------------------------------------------------------------------------|---------------------------------------------------------------------------------------------------------------------------------------------------------------|------------------------------------------------------------------------------------------------------------------------------------------------|------------------------------------------------------------------------------------------------------------------------------------------------------------------------------------------------|----------------------------------|----------------------------|---------------------------------------------------------------------------------------------------|
|                                                                                                                                                                      |                                                                                                                                                                                                                               |                                                                                                                                                               |                                                                                                                                                | Participants from range of ethnic and SES groups                                                                                                                                               |                                  |                            |                                                                                                   |
| <b>Finding 13: Teaching strategies and materials such as video examples and role play are valued when made relevant to families and provided in a written format</b> | Amsbary, 2019, 2020; Coletti, 2011; Daczewitz, 2015; Faldt, 2020; Manohar, 2020; Meadan, 2015, 2019; Mendez, 2019; Pennington, 2009; Senent-Capuz, 2020; Stahmer, 2017; Stockwell, 2019                                       | <b>Minor concerns</b> based on the assessment of 3 studies with no, 6 with minor, 2 with moderate, and one with serious methodological limitations            | <b>Minor concerns</b> based on all studies reporting value of teaching and learning methods and five reporting importance of written materials | <b>Minor concerns</b> regarding relevance as studies had good geographical spread<br><br>Included a good range of diagnoses<br><br>Participants from range of ethnic and SES groups            | <b>Minor concerns</b>            | <b>High confidence</b>     | Minor concerns regarding methodological limitations; adequacy coherence and relevance             |
| <b>Finding 14: Parents appeared to value and use strategies that they believed had positive impacts on their children's communication</b>                            | Amsbary, 2019; Bloxam, 2015; Coletti, 2011; Daczewitz, 2015; Donaldson, 2011; Faldt, 2020; Kinnard, 2014; Kummerer, 2006; Leadbitter, 2020; Meaden, 2015; Mendez, 2019; Senent-Capuz, 2020; Shamsudin, 2021; Waddington, 2020 | <b>No or very minor concerns</b> based on the assessment of 8 studies with no, 3 with minor, 2 with moderate, and one with serious methodological limitations | <b>No or very minor concerns</b>                                                                                                               | <b>No or very minor concerns</b> regarding relevance as studies had good geographical spread<br><br>Included a good range of diagnoses<br><br>Participants from range of ethnic and SES groups | <b>No or very minor concerns</b> | <b>High confidence</b>     | No or very minor concerns regarding methodological limitations, coherence, relevance and adequacy |
| <b>Finding 15: Using technology may provide practical benefits for some</b>                                                                                          | Aggarwal, 2015; Amsbary, 2019; Daczewitz, 2015; Faldt, 2020; Mendez,                                                                                                                                                          | <b>Moderate concerns</b> based on the assessment of 2                                                                                                         | <b>Minor concerns</b>                                                                                                                          | <b>Minor concerns</b> regarding relevance as studies had good                                                                                                                                  | Minor concerns                   | <b>Moderate confidence</b> | Moderate concerns about methodological limitations; minor concerns about                          |

|                                                                                                                                  |                                      |                                                                                                  |  |                                                                                                                       |  |  |                                    |
|----------------------------------------------------------------------------------------------------------------------------------|--------------------------------------|--------------------------------------------------------------------------------------------------|--|-----------------------------------------------------------------------------------------------------------------------|--|--|------------------------------------|
| <b>families to engaging with the intervention, although also presents challenges when compared to face to face intervention.</b> | 2019; Pickard, 2016; Stockwell, 2019 | with no, 1 with minor, 3 with moderate concerns, and one with serious methodological limitations |  | geographical spread<br><br>Included a good range of diagnoses<br><br>Participants from range of ethnic and SES groups |  |  | coherence relevance and t adequacy |
|----------------------------------------------------------------------------------------------------------------------------------|--------------------------------------|--------------------------------------------------------------------------------------------------|--|-----------------------------------------------------------------------------------------------------------------------|--|--|------------------------------------|

#### Therapeutic Relationship

| Summary of review finding                                                                                                                                       | Studies contributing to the review finding                                                                                                                                                                                            | Methodological limitations                                                                                               | Coherence             | Relevance                                                                                                                                                                                      | Adequacy              | CERQual assessment of confidence in the evidence | Explanation of CERQual assessment                                                                                          |
|-----------------------------------------------------------------------------------------------------------------------------------------------------------------|---------------------------------------------------------------------------------------------------------------------------------------------------------------------------------------------------------------------------------------|--------------------------------------------------------------------------------------------------------------------------|-----------------------|------------------------------------------------------------------------------------------------------------------------------------------------------------------------------------------------|-----------------------|--------------------------------------------------|----------------------------------------------------------------------------------------------------------------------------|
| <b>Finding 16: Parental engagement and experience of the intervention may be improved when they, and their child have good relationship with the therapist.</b> | Amsbary, 2020; Amsbary, 2019; Carr, 2011; Coletti, 2011; Faldt, 2020; Frugone Jarmillo, 2020; Kinnard, 2014; Leadbitter, 2020; Levickis, 2020; Pennington, 2009; Senent-Capuz, 2020; Stahmer, 2017; Stockwell, 2019; Waddington, 2020 | <b>Minor concerns</b> based on the assessment of 7 with no, 4 with minor, and 3 with moderate methodological limitations | <b>Minor concerns</b> | <b>No or very minor concerns</b> regarding relevance as studies had good geographical spread<br><br>Included a good range of diagnoses<br><br>Participants from range of ethnic and SES groups | <b>Minor concerns</b> | <b>High confidence</b>                           | No or very minor concerns regarding relevant; minor concerns regarding methodological limitations, adequacy and coherence, |

#### Impact

#### Changes in the child

| Summary of review finding | Studies contributing to the review finding | Methodological limitations | Coherence | Relevance | Adequacy | CERQual assessment of confidence in the evidence | Explanation of CERQual assessment |
|---------------------------|--------------------------------------------|----------------------------|-----------|-----------|----------|--------------------------------------------------|-----------------------------------|
|---------------------------|--------------------------------------------|----------------------------|-----------|-----------|----------|--------------------------------------------------|-----------------------------------|

|                                                                                                                                                   |                                                                                                                                                                                                                                                                                                                                                                           |                                                                                                                                               |                |                                                                                                                                                                                                |                |                        |                                                                                                                               |
|---------------------------------------------------------------------------------------------------------------------------------------------------|---------------------------------------------------------------------------------------------------------------------------------------------------------------------------------------------------------------------------------------------------------------------------------------------------------------------------------------------------------------------------|-----------------------------------------------------------------------------------------------------------------------------------------------|----------------|------------------------------------------------------------------------------------------------------------------------------------------------------------------------------------------------|----------------|------------------------|-------------------------------------------------------------------------------------------------------------------------------|
| <b>Finding 17: Most parents report improvement in their child's communication, and associated skills following PCIT (level of confidence xyz)</b> | Amsbary, 2019, 2020; Carr, 2011; Coletti, 2011; Donaldson, 2011; Faldt, 2020; Frugone Jarmillo, 2020; Kinnard, 2014; Kummerer, 2007, 2009; Leadbitter, 2020; Levickis, 2020; Manohar, 2020; Meadan, 2015, 2019; Mendez, 2019; Patterson, 2011; Pennington, 2009; Pickard, 2016; Schertz, 2005, 2007; Senent-Capuz, 2020; Shamsudin, 2021; Stahmer, 2017; Waddington, 2020 | <b>No or very minor concerns</b> based on the assessment of 10 studies with no, 7 with minor, and 6 with moderate methodological limitations. | Minor concerns | <b>No or very minor concerns</b> regarding relevance as studies had good geographical spread<br><br>Included a good range of diagnoses<br><br>Participants from range of ethnic and SES groups | Minor concerns | <b>High confidence</b> | No or very minor concerns regarding methodological limitations and relevance, Minor concerns regarding coherence and adequacy |
|---------------------------------------------------------------------------------------------------------------------------------------------------|---------------------------------------------------------------------------------------------------------------------------------------------------------------------------------------------------------------------------------------------------------------------------------------------------------------------------------------------------------------------------|-----------------------------------------------------------------------------------------------------------------------------------------------|----------------|------------------------------------------------------------------------------------------------------------------------------------------------------------------------------------------------|----------------|------------------------|-------------------------------------------------------------------------------------------------------------------------------|

#### Parental empowerment and wellbeing

| Summary of review finding                                                                                                                                  | Studies contributing to the review finding                                                                                                                                            | Methodological limitations                                                                                                                | Coherence      | Relevance                                                                                                                              | Adequacy                         | CERQual assessment of confidence in the evidence | Explanation of CERQual assessment                                                                                |
|------------------------------------------------------------------------------------------------------------------------------------------------------------|---------------------------------------------------------------------------------------------------------------------------------------------------------------------------------------|-------------------------------------------------------------------------------------------------------------------------------------------|----------------|----------------------------------------------------------------------------------------------------------------------------------------|----------------------------------|--------------------------------------------------|------------------------------------------------------------------------------------------------------------------|
| <b>Finding 18: Parents may feel empowered after taking part in PCIT due to their increased knowledge and skills in promoting communication development</b> | Amsbary, 2019, 2020; Bloxam, 2015; Carr, 2011; Coletti, 2011; Daczewitz, 2015; Donaldson, 2011; Faldt, 2020; Frugone Jarmillo, 2020; Kinnard, 2014; Kummerer, 2006; Leadbitter, 2020; | <b>Minor concerns</b> based on the assessment of 10 with no, 7 with minor, 7 with moderate, and 1 with serious methodological limitations | Minor concerns | <b>No or very minor concerns</b> regarding relevance as studies had good geographical spread<br><br>Included a good range of diagnoses | <b>No or very minor concerns</b> | <b>High confidence</b>                           | No or very minor concerns regarding methodological limitations, relevance and adequacy, minor concerns coherence |

|                                                                                                                                                                                                                           |                                                                                                                                                                                                                                                                                                                                        |                                                                                                                                                                  |                       |                                                                                                                                                                                                                            |                       |                            |                                                                                                                                                    |
|---------------------------------------------------------------------------------------------------------------------------------------------------------------------------------------------------------------------------|----------------------------------------------------------------------------------------------------------------------------------------------------------------------------------------------------------------------------------------------------------------------------------------------------------------------------------------|------------------------------------------------------------------------------------------------------------------------------------------------------------------|-----------------------|----------------------------------------------------------------------------------------------------------------------------------------------------------------------------------------------------------------------------|-----------------------|----------------------------|----------------------------------------------------------------------------------------------------------------------------------------------------|
|                                                                                                                                                                                                                           | Levickis, 2020;<br>Manohar, 2020;<br>Meadan, 2015, 2019;<br>Mendez, 2019;<br>Patterson, 2011;<br>Pennington, 2009;<br>Pickard, 2016;<br>Schertz, 2005, 2007;<br>Senent-Capuz, 2020;<br>Shamsudin, 2021;<br>Stahmer, 2017;<br>Stockwell, 2019                                                                                           |                                                                                                                                                                  |                       | Participants from<br>range of ethnic<br>and SES groups                                                                                                                                                                     |                       |                            |                                                                                                                                                    |
| <b>Finding 19:<br/>Parent's describe<br/>an increased<br/>understanding of<br/>their child and<br/>their needs after<br/>taking part in the<br/>intervention<br/>which helps them<br/>to advocate for<br/>their child</b> | Amsbary, 2020;<br>Bloxam, 2015; Carr,<br>2011; Coletti, 2011;<br>Daczewitz, 2015;<br>Faldt, 2020; Frugone<br>Jarmillo, 2020;<br>Kinnard, 2014;<br>Kummerer, 2006;<br>Leadbitter, 2020;<br>Manohar, 2020;<br>Meadan, 2015, 2019;<br>Pennington, 2009;<br>Pickard, 2016;<br>Schertz, 2005, 2007;<br>Senent-Capuz, 2020;<br>Stahmer, 2017 | <b>Minor concerns</b><br>based on the<br>assessment 6<br>with no, 6<br>with minor, 5<br>with moderate,<br>and 1 with<br>serious<br>methodological<br>limitations | <b>Minor concerns</b> | <b>No or very minor<br/>concerns</b><br>regarding<br>relevance as<br>studies had good<br>geographical<br>spread<br><br>Included a good<br>range of diagnoses<br><br>Participants from<br>range of ethnic<br>and SES groups | <b>Minor concerns</b> | <b>High<br/>confidence</b> | No or very minor<br>concerns regarding<br>methodological<br>limitations ; minor<br>concerns regarding<br>coherence, relevance<br>and adequacy      |
| <b>Finding 20: After<br/>taking part in PCIT<br/>interventions,<br/>parents perceived<br/>an increase in<br/>their confidence<br/>and stronger<br/>relationships with<br/>their children</b>                              | Amsbary, 2020;<br>Amsbary, 2019;<br>Bloxam, 2015;<br>Carr, 2011; Coletti,<br>2011; Daczewitz,<br>2015; Donaldson,<br>2011; Faldt, 2020;<br>Frugone Jarmillo,<br>2020; Kinnard, 2014;                                                                                                                                                   | <b>Minor concerns</b><br>based on the<br>assessment 9<br>with no, 6 with<br>minor, 6 with<br>moderate, and 1<br>with serious<br>methodological<br>limitations    | <b>Minor concerns</b> | <b>No or very minor<br/>concerns</b><br>regarding<br>relevance as<br>studies had good<br>geographical<br>spread                                                                                                            | <b>Minor concerns</b> | <b>High<br/>confidence</b> | No or very minor<br>concerns regarding<br>methodological<br>limitations and<br>relevance, minor<br>concerns regarding<br>coherence and<br>adequacy |

|                                                |                                                                                                                                                                                               |  |  |                                                                                            |  |  |  |
|------------------------------------------------|-----------------------------------------------------------------------------------------------------------------------------------------------------------------------------------------------|--|--|--------------------------------------------------------------------------------------------|--|--|--|
| <b>which affected their overall wellbeing.</b> | Kummerer, 2009; Leadbitter, 2020; Levickis, 2020; Manohar, 2020; Meadan, 2015, 2019; Pennington, 2009; Pickard, 2016; Schertz, 2005, 2007; Senent-Capuz, 2020; Shamsudin, 2021; Stahmer, 2017 |  |  | Included a good range of diagnoses<br><br>Participants from range of ethnic and SES groups |  |  |  |
|------------------------------------------------|-----------------------------------------------------------------------------------------------------------------------------------------------------------------------------------------------|--|--|--------------------------------------------------------------------------------------------|--|--|--|

#### Transitions

| Summary of review finding                                                                                                                    | Studies contributing to the review finding                                                                                                                                                            | Methodological limitations                                                                                               | Coherence             | Relevance                                                                                                                                                                           | Adequacy              | CERQual assessment of confidence in the evidence | Explanation of CERQual assessment                                                      |
|----------------------------------------------------------------------------------------------------------------------------------------------|-------------------------------------------------------------------------------------------------------------------------------------------------------------------------------------------------------|--------------------------------------------------------------------------------------------------------------------------|-----------------------|-------------------------------------------------------------------------------------------------------------------------------------------------------------------------------------|-----------------------|--------------------------------------------------|----------------------------------------------------------------------------------------|
| <b>Finding 21: At the end of PCIT interventions, parents may need continued support and guidance for transitioning from the intervention</b> | Amsbary, 2020; Amsbary, 2019; Carr, 2011; Faldt, 2020; Kinnard, 2014; Levickis, 2020; Manohar, 2020; Meadan, 2019; Mendez, 2019; Patterson, 2011; Senent-Capuz, 2020; Stahmer, 2017; Waddington, 2020 | <b>Minor concerns</b> based on the assessment of 5 with no, 7 with minor, and 5 with moderate methodological limitations | <b>Minor concerns</b> | <b>Minor concerns</b> regarding relevance as studies had good geographical spread<br><br>Included a good range of diagnoses<br><br>Participants from range of ethnic and SES groups | <b>Minor concerns</b> | <b>High confidence</b>                           | Minor concerns regarding methodological limitations, coherence, relevance and adequacy |
