# Supplementary material
Source: publisher figshare collection journal article supplement (https://asha.figshare.com/articles/dataset/_/14978454)
Supplement: Supplementary file 3 [file 1]

**Supplemental Material S1.** Sample search string for Scopus Database (searched February 4, 2021 = 482 results).

|     |                                                                                                                                                                                                                                                 |
|-----|-------------------------------------------------------------------------------------------------------------------------------------------------------------------------------------------------------------------------------------------------|
|     | (TITLE-ABS-KEY(experienc* OR perception* ))                                                                                                                                                                                                     |
| AND | (TITLE-ABS-KEY("parent-child interact*") OR (focus* W/2 stimulation) OR (natural* W/2 teaching) OR (milieu W/2 teaching) OR (responsiv* W/2 education) OR (responsiv* W/2 teaching) OR Hanen OR (parent W/2 mediat*) OR (dialogic W/2 reading)) |
| AND | (TITLE-ABS-KEY(coach* OR educat* OR intervention* OR learn* OR program* OR teach* OR train* OR therap*))                                                                                                                                        |
| AND | (TITLE-ABS-KEY(parent* OR maternal* OR mother* OR father* OR paternal* OR carer* OR caregiver* OR care-giver*))                                                                                                                                 |
| AND | (TITLE-ABS-KEY(child* OR speech* OR languag* OR communicat*))                                                                                                                                                                                   |
| AND | (TITLE-ABS-KEY(delay* OR disorder* OR disabilit* OR difficult* OR impair* OR need OR problem*))                                                                                                                                                 |
| AND | (TITLE-ABS-KEY(qualitative OR "mixed*method*" OR narrative OR phenomenol* OR ethno* OR questionnaire OR "grounded theory" OR "case*study*" OR "action research" OR "focus group" OR thematic OR construction* OR hermeneutic OR heurist* ))     |
