# Supplementary material
Source: publisher figshare collection journal article supplement (https://asha.figshare.com/articles/dataset/_/14978454)
Supplement: Supplementary file 4 [file 1]

**Supplemental Material S4.** Enhancing Transparency in Reporting the Synthesis of Qualitative Research (ENTREQ) checklist.

| Item                          | Guide & Description                                                                                                                                                                                                                                                                                                                                                                                                | Included in Manuscript          |
|-------------------------------|--------------------------------------------------------------------------------------------------------------------------------------------------------------------------------------------------------------------------------------------------------------------------------------------------------------------------------------------------------------------------------------------------------------------|---------------------------------|
| 1. Aim                        | State the research question the synthesis addresses.                                                                                                                                                                                                                                                                                                                                                               | p. 2-3                          |
| 2. Synthesis methodology      | Identify the synthesis methodology or theoretical framework which underpins the synthesis, and describe the rationale for choice of methodology ( <i>e.g., meta-ethnography, thematic synthesis, critical interpretive synthesis, grounded theory synthesis, realist synthesis, meta-aggregation, meta-study, framework synthesis</i> ).                                                                           | p. 3, Thematic synthesis        |
| 3. Approach to searching      | Indicate whether the search was pre-planned ( <i>comprehensive search strategies to seek all available studies</i> ) or iterative ( <i>to seek all available concepts until they theoretical saturation is achieved</i> ).                                                                                                                                                                                         | p. 3                            |
| 4. Inclusion criteria         | Specify the inclusion/exclusion criteria ( <i>e.g., in terms of population, language, year limits, type of publication, study type</i> ).                                                                                                                                                                                                                                                                          | p. 2-3                          |
| 5. Data sources               | Describe the information sources used ( <i>e.g., electronic databases (MEDLINE, EMBASE, CINAHL, psycINFO, Econlit), grey literature databases (digital thesis, policy reports), relevant organisational websites, experts, information specialists, generic web searches (Google Scholar) hand searching, reference lists</i> ) and when the searches conducted; provide the rationale for using the data sources. | p. 3                            |
| 6. Electronic Search strategy | Describe the literature search ( <i>e.g., provide electronic search strategies with population terms, clinical or health topic terms, experiential or social phenomena related terms, filters for qualitative research, and search limits</i> ).                                                                                                                                                                   | p. 3 & Supplemental Material S1 |
| 7. Study screening methods    | Describe the process of study screening and sifting ( <i>e.g., title, abstract and full text review, number of independent reviewers who screened studies</i> ).                                                                                                                                                                                                                                                   | p. 3                            |
| 8. Study characteristics      | Present the characteristics of the included studies ( <i>e.g., year of publication, country, population, number of participants, data collection, methodology, analysis, research questions</i> ).                                                                                                                                                                                                                 | p. 4-9 & Table 1                |
| 9. Study selection results    | Identify the number of studies screened and provide reasons for study exclusion ( <i>e.g., for comprehensive searching, provide numbers of studies screened and reasons for exclusion indicated in a figure/flowchart; for iterative searching describe reasons for study exclusion and inclusion based on modifications to the research question and/or contribution to theory development</i> ).                 | p. 3-4 & Figure 1               |
| 10. Rationale for appraisal   | Describe the rationale and approach used to appraise the included studies or selected findings ( <i>e.g., assessment of conduct (validity and robustness), assessment of reporting (transparency), assessment of content and utility of the findings</i> ).                                                                                                                                                        | p. 3-4                          |
| 11. Appraisal items           | State the tools, frameworks and criteria used to appraise the studies or selected findings ( <i>e.g., Existing tools: CASP, QARI, COREQ, Mays and Pope; reviewer developed tools; describe the domains assessed: research team, study design, data analysis and interpretations, reporting</i> ).                                                                                                                  | p. 3-4, CASP                    |
| 12. Appraisal process         | Indicate whether the appraisal was conducted independently by more than one reviewer and if consensus was required.                                                                                                                                                                                                                                                                                                | p. 3-4                          |
| 13. Appraisal results         | Present results of the quality assessment and indicate which articles, if any, were weighted/excluded based on the assessment and give the rationale                                                                                                                                                                                                                                                               | p. 3-4 & Table 1                |

|                          |                                                                                                                                                                                                                                                              |                    |
|--------------------------|--------------------------------------------------------------------------------------------------------------------------------------------------------------------------------------------------------------------------------------------------------------|--------------------|
| 14. Data extraction      | Indicate which sections of the primary studies were analysed and how were the data extracted from the primary studies? <i>(e.g., all text under the headings "results /conclusions" were extracted electronically and entered into a computer software).</i> | p. 3-4             |
| 15. Software             | State the computer software used, if any.                                                                                                                                                                                                                    | p. 3-4, NVIVO      |
| 16. Number of reviewers  | Identify who was involved in coding and analysis                                                                                                                                                                                                             | p. 3-4             |
| 17. Coding               | Describe the process for coding of data <i>(e.g., line by line coding to search for concepts).</i>                                                                                                                                                           | p. 3-4             |
| 18. Study comparison     | Describe how were comparisons made within and across studies <i>(e.g., subsequent studies were coded into pre-existing concepts, and new concepts were created when deemed necessary).</i>                                                                   | p. 4-9             |
| 19. Derivation of themes | Explain whether the process of deriving the themes or constructs was inductive or deductive.                                                                                                                                                                 | p. 4-9             |
| 20. Quotations           | Provide quotations from the primary studies to illustrate themes/constructs, and identify whether the quotations were participant quotations of the author's interpretation.                                                                                 | p. 12-20 & Table 2 |
| 21. Synthesis output     | Present rich, compelling and useful results that go beyond a summary of the primary studies <i>(e.g., new interpretation, models of evidence, conceptual models, analytical framework, development of a new theory or construct).</i>                        | p. 4-24            |
